# Supplementary material for: Translational Control Protein 80 Stimulates IRES-Mediated Translation of p53 mRNA in Response to DNA Damage
Source: Hindawi journal article supplement (doi:10.1155/2015/708158), 2015-01-01

## Supplemental Materials:

**Figure S1. (A) Overexpression of RHA leads to enhanced p53 IRES activity.** MCF-7 cells were co-transfected with pRF or pR5UTRF along with either pcDNA3.1 or pcDNA3.1/HisB/TCP80. Twenty-four hours following the transfection, the cells were lysed and a dual-luciferase assay was performed to detect firefly (Fluc) and renilla (Rluc) luciferase activities as described in Experimental procedures. **(B) Overexpression of RHA does not lead to a further increase in p53 IRES activity following DNA damage.** MCF-7 cells were co-transfected with pRF or pR5UTRF along with either pcDNA3.1 or pcDNA3.1/HisB/TCP80. Twenty-two hours following the transfection, the cells were treated with etoposide for 2 hours. The cells were then lysed and a dual-luciferase assay was performed to detect firefly (Fluc) and renilla (Rluc) luciferase activities as described above. The results presented in A and B are average  $\pm$  SEM from three individual experiments.

# Figure S1

## A.

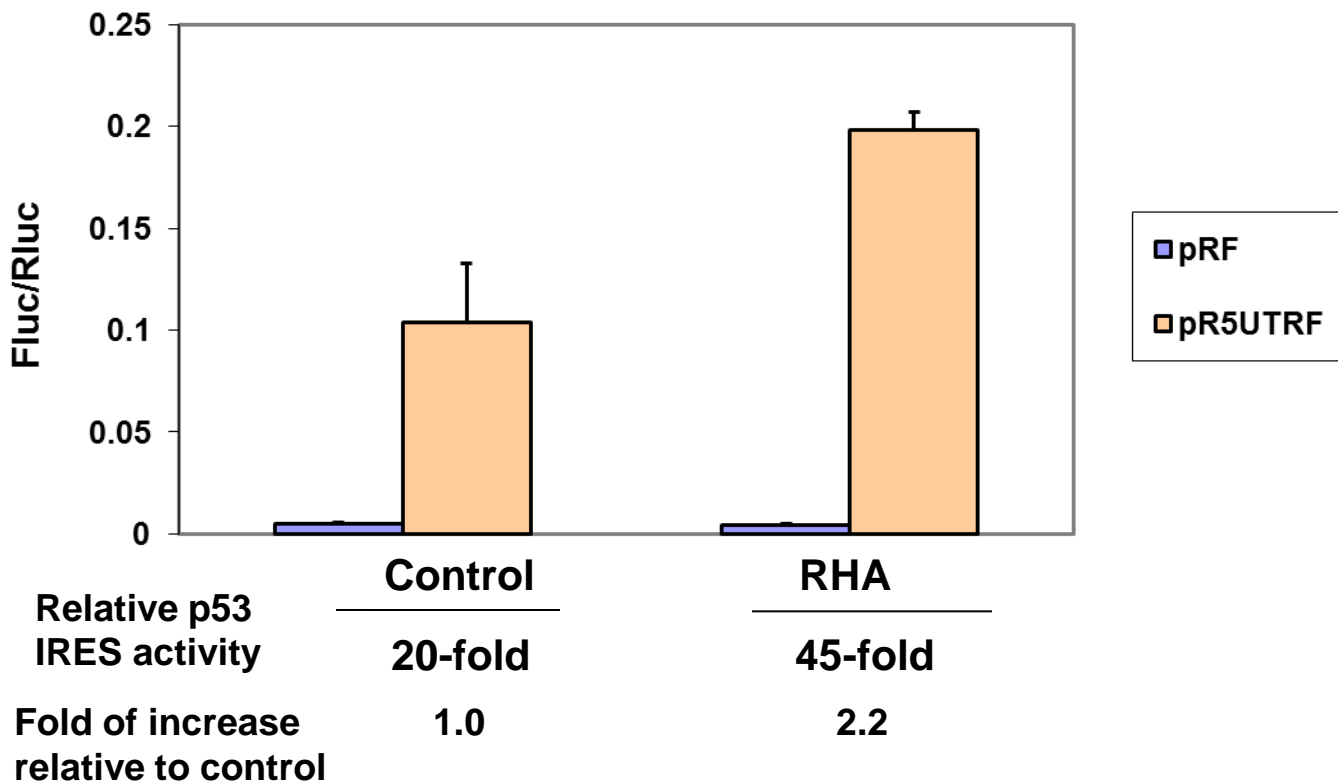

## B.

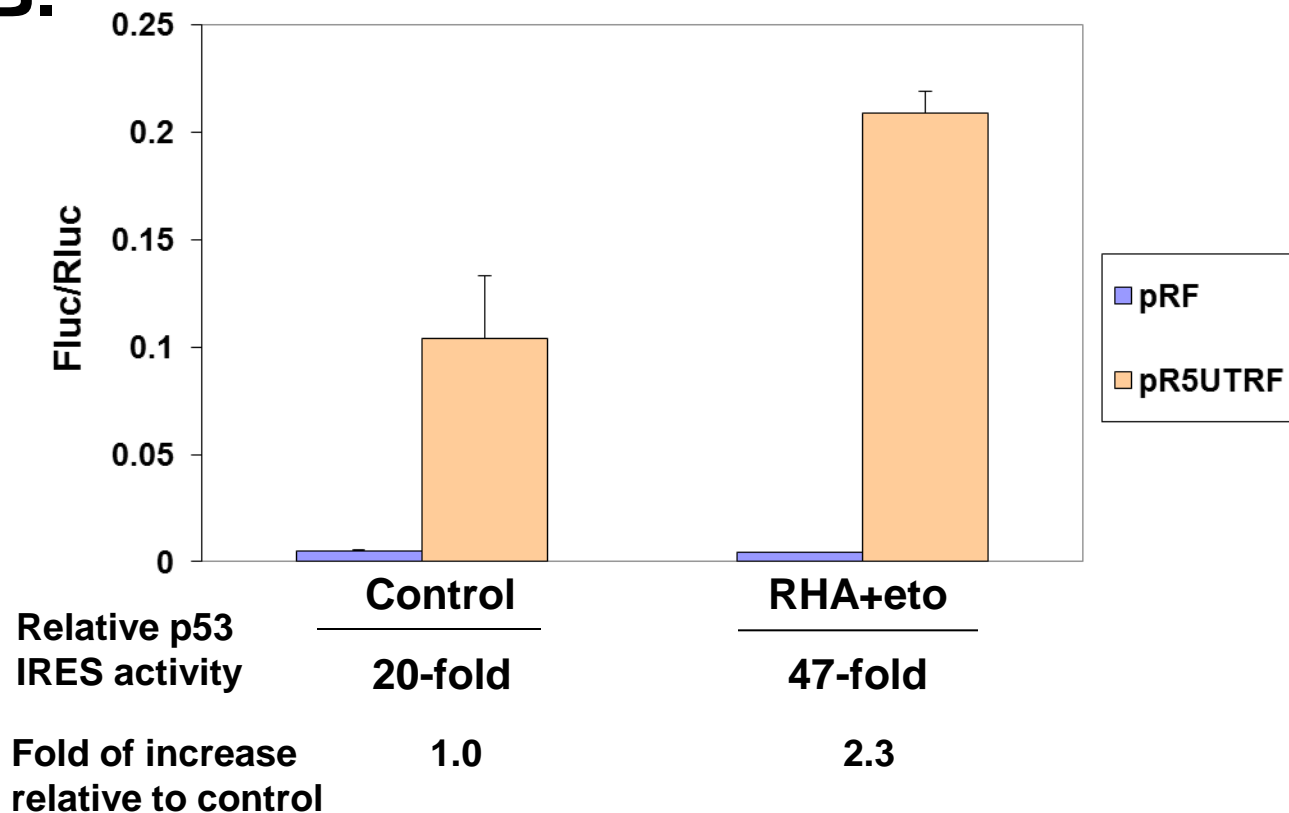

Supplement: f1 [file 708158.f1.pdf]
